# Supplementary material for: Pulsed Electric Field and Salvia officinalis L. Leaves: A Successful Combination for the Extraction of High Value Added Compounds
Source: MDPI journal article supplement (doi:10.3390/foods10092014), 2021-08-27
Supplement: s1 [file s1]

### Figure Legends

**Figure S1.** HPLC total area for PEF and Reference extracts in five different tested solvents and a pulse duration of 10  $\mu$ sec.

**Figure S2.** HPLC total area for PEF and Reference extracts in five different tested solvents and a pulse duration of 100  $\mu$ sec.

**Figure S3.** Overlay of chromatograms of extract and reference compounds at 320 nm after PEF with pulse duration 100  $\mu$ sec and extraction solvent 25% EtOH. Peak 1: Caffeic acid; Peak 2: 6-Hydroxy-luteolin-7-O-glucoside; Peak 3: Luteolin 7-O-glucuronide; Peak 4: Rosmarinic acid.

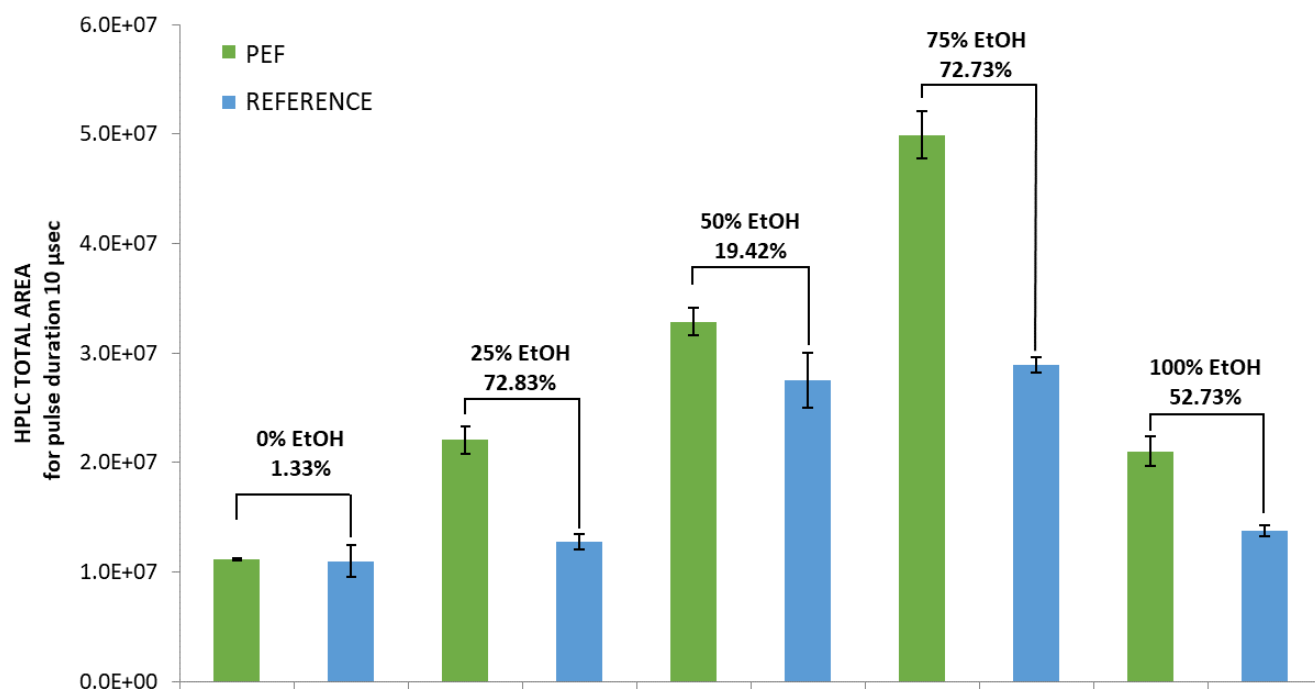

**Figure S1.** HPLC total area for PEF and Reference extracts in five different tested solvents and a pulse duration of 10  $\mu$ sec.

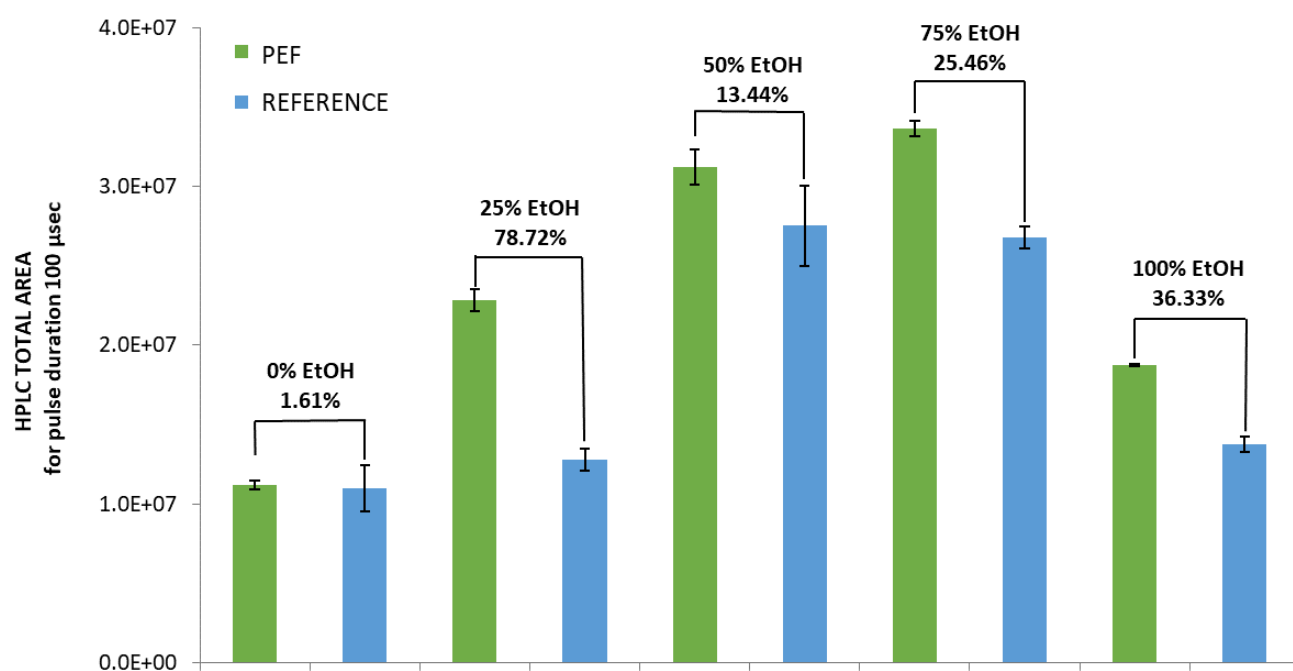

**Figure S2.** HPLC total area for PEF and Reference extracts in five different tested solvents and a pulse duration of 100  $\mu$ sec.

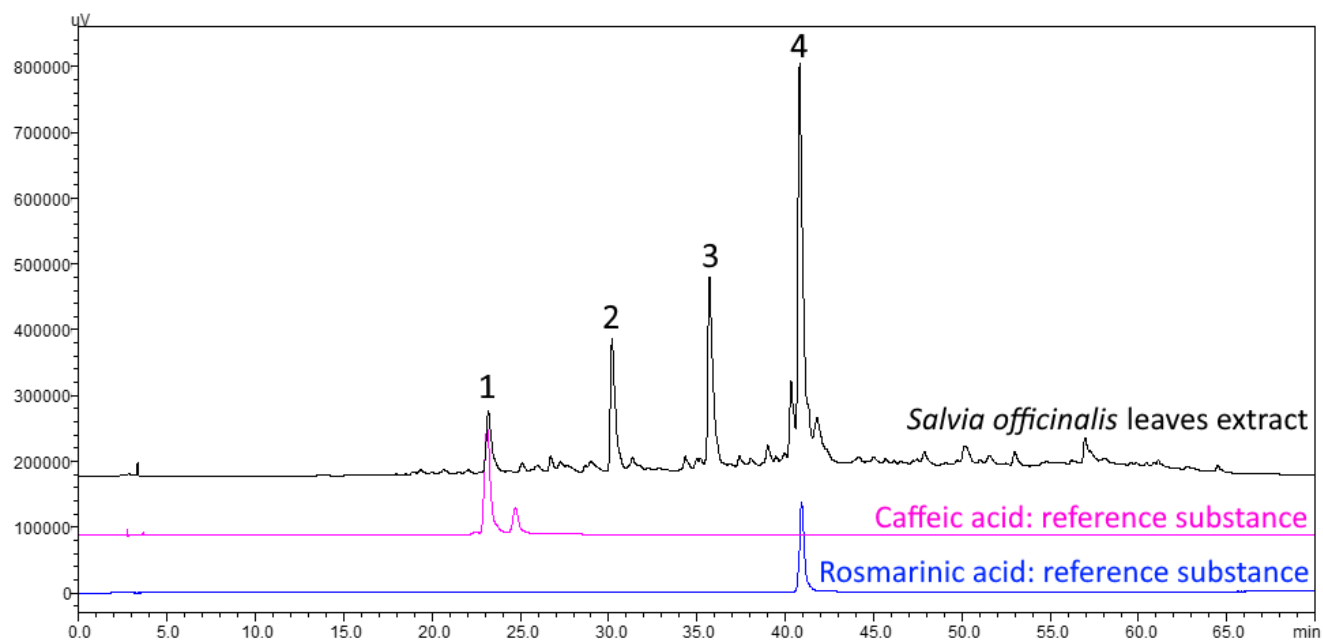

**Figure S3.** Overlay of chromatograms of extract and reference compounds at 320 nm after PEF with pulse duration 100  $\mu$ sec and extraction solvent 25% EtOH. Peak 1: Caffeic acid; Peak 2: 6-Hydroxy-luteolin-7-O-glucoside; Peak 3: Luteolin 7-O-glucuronide; Peak 4: Rosmarinic acid.
